# Supplementary material
Source: ML conference proceedings conference paper supplement (https://proceedings.mlr.press/v80/ghoshal18a.html)
Supplement: Supplementary file [file ghoshal18a-supp.pdf]

### A. Proof of Lemma 3

*Proof.* We adapt the proof of Rademacher based uniform convergence for our purpose. Fix the distribution over  $\mathbb{T}$  to  $\mathcal{R}(\mathbb{S}, w')$  for some  $w'$ . Recall that  $\bar{\mathbb{T}} = \{\bar{\mathbb{T}}_i\}$  with  $\bar{\mathbb{T}}_i = \{y_i\} \cup \mathbb{T}_i$  and the elements of  $\mathbb{T}_i$  are drawn i.i.d. from  $\mathcal{R}(x_i, w')$ . Since the only random part in  $\bar{\mathbb{T}}_i$  is  $\mathbb{T}_i$  and  $y_i \in \mathbb{S}$ , it suffices to show concentration of  $\mathbb{E}_{\mathbb{T}} [L(w, \mathbb{S}, \mathbb{T})] - L(w, \mathbb{S}, \mathbb{T})$  for all  $w$  and  $\mathbb{S}$ . For a fixed  $\mathbb{S}$ , we will consider  $L(w, \mathbb{S}, \mathbb{T})$  to be a function of  $\mathbb{T}$  and  $w$  and denote it by  $L(\mathbb{T}, w; \mathbb{S})$ . In what follows, we will consider  $\mathbb{T}$  to be an  $mn$ -dimensional vector whose elements (structured outputs) are conditionally independent (but not identically distributed) given a data set  $\mathbb{S}$ . Define,

$$\varphi(\mathbb{T}; \mathbb{S}) \stackrel{\text{def}}{=} \sup_{w \in \mathbb{R}^{d,s}} \mathbb{E}_{\mathbb{T} \sim \mathcal{R}(\mathbb{S}, w')} [L(\mathbb{T}, w; \mathbb{S})] - L(\mathbb{T}, w; \mathbb{S}). \quad (20)$$

$\varphi(\mathbb{T}; \mathbb{S})$  is  $(1/m)$ -Lipschitz and the elements of  $\mathbb{T}$  are independent. Therefore, by McDiarmid's inequality, we have that:

$$\Pr_{\mathbb{T}} \left\{ \mathbb{E}_{\mathbb{T}} [\varphi(\mathbb{T}; \mathbb{S})] - \varphi(\mathbb{T}; \mathbb{S}) \leq \sqrt{\frac{\ln(1/\delta)}{2m}} \mid \mathbb{S} \right\} \geq 1 - \delta. \quad (21)$$

Therefore, with probability at least  $1 - \delta$  over the choice of  $\mathbb{T}$ :

$$\begin{aligned} & (\forall w \in \mathbb{R}^{d,s}) \mathbb{E}_{\mathbb{T}} [L(\mathbb{T}, w; \mathbb{S})] - L(\mathbb{T}, w; \mathbb{S}) \\ & \leq \sup_{w \in \mathbb{R}^{d,s}} \mathbb{E}_{\mathbb{T}} [L(\mathbb{T}, w; \mathbb{S})] - L(\mathbb{T}, w; \mathbb{S}) = \varphi(\mathbb{T}; \mathbb{S}) \\ & \leq \mathbb{E}_{\mathbb{T}} [\varphi(\mathbb{T}; \mathbb{S})] + \sqrt{\frac{\ln 1/\delta}{2m}}. \end{aligned} \quad (22)$$

Next, we will use a symmetrization argument to bound  $\mathbb{E}_{\mathbb{T}} [\varphi(\mathbb{T}; \mathbb{S})]$ . Let  $\mathbb{T}' \sim \mathcal{R}(\mathbb{S})$  be an independent copy of  $\mathbb{T}$ . Observe that:

$$\begin{aligned} \mathbb{E}_{\mathbb{T}'} [L(\mathbb{T}, w; \mathbb{S}) \mid \mathbb{T}] &= L(\mathbb{T}, w; \mathbb{S}) \\ \mathbb{E}_{\mathbb{T}'} [L(\mathbb{T}', w; \mathbb{S}) \mid \mathbb{T}] &= \mathbb{E}_{\mathbb{T}} [L(\mathbb{T}, w; \mathbb{S})]. \end{aligned}$$

Now,

$$\begin{aligned} & \mathbb{E}_{\mathbb{T}} [\varphi(\mathbb{T})] \\ &= \mathbb{E}_{\mathbb{T}} \left[ \sup_{w \in \mathbb{R}^{d,s}} \mathbb{E}_{\mathbb{T}} [L(\mathbb{T}, w; \mathbb{S})] - L(\mathbb{T}, w; \mathbb{S}) \right] \\ &= \mathbb{E}_{\mathbb{T}} \left[ \sup_{w \in \mathbb{R}^{d,s}} \mathbb{E}_{\mathbb{T}'} [L(\mathbb{T}', w; \mathbb{S}) \mid \mathbb{T}] - \mathbb{E}_{\mathbb{T}'} [L(\mathbb{T}, w; \mathbb{S}) \mid \mathbb{T}] \right] \\ &\leq \mathbb{E}_{\mathbb{T}, \mathbb{T}'} \left[ \sup_{w \in \mathbb{R}^{d,s}} \frac{1}{m} \sum_{i=1}^m z'_i - z_i \right], \end{aligned}$$

where  $z'_i = \Pr_{\gamma} \{f_{w, \gamma, \mathbb{T}'}(x_i) \neq y_i\}$  and  $z_i = \Pr_{\gamma} \{f_{w, \gamma, \mathbb{T}}(x_i) \neq y_i\}$ . Since  $z'_i - z_i$  has a distribution that is symmetric around zero,  $z'_i - z_i$  and  $\sigma_i(z'_i - z_i)$  have the same distribution, where  $\sigma_i$ 's are independent Rademacher variables. Continuing the above derivation,

$$\begin{aligned} & \mathbb{E}_{\mathbb{T}} [\varphi(\mathbb{T})] \\ & \leq \mathbb{E}_{\mathbb{T}, \mathbb{T}', \sigma} \left[ \sup_{w \in \mathbb{R}^{d,s}} \frac{1}{m} \sum_{i=1}^m \sigma_i(z'_i - z_i) \right] \\ & = \frac{2}{m} \mathbb{E}_{\mathbb{T}, \sigma} \left[ \sup_{w \in \mathbb{R}^{d,s}} \sum_{i=1}^m \sigma_i \Pr_{\gamma} \{f_{w, \gamma, \mathbb{T}}(x_i) \neq y_i\} \right] \\ & = 2 \mathbb{E}_{\mathbb{T}} \left[ \widehat{\mathfrak{R}}_{\mathbb{T}}(\mathcal{G}) \right], \end{aligned}$$

where  $\widehat{\mathfrak{R}}_{\mathbb{T}}(\mathcal{G})$  is the empirical Rademacher complexity of the function class  $\mathcal{G} = \{g_w \mid w \in \mathbb{R}^{d,s}\}$  with respect to  $\mathbb{T}$ , with  $g_w(x, y) = \Pr_{\gamma} \{f_{w,\gamma,\mathbb{T}}(x) \neq y\}$ . Next, using the same argument as in the proof of Theorem 1, we can bound  $\widehat{\mathfrak{R}}_{\mathbb{T}}(\mathcal{G})$  for any set  $\mathbb{T}$ , and get the following bound:

$$\mathbb{E}_{\mathbb{T}} [\varphi(\mathbb{T})] \leq 2\sqrt{\frac{s(\log d + 2\log(nr))}{m}} \quad (23)$$

Note that the above differs from the bound in Theorem 1 in the log factor since we need to consider linear orderings of  $nr$  structured outputs. Therefore from (22) and (23) we have that:

$$\begin{aligned} \Pr_{\mathbb{T}}\{(\forall w \in \mathbb{R}^{d,s}) \mathbb{E}_{\mathbb{T}} [L(\mathbb{T}, w; \mathbb{S})] - L(\mathbb{T}, w; \mathbb{S}) \\ \leq \varepsilon_2(d, s, n, r, m, \delta) \mid \mathbb{S}\} \geq 1 - \delta. \end{aligned} \quad (24)$$

By Definition 1 and from the results by (Bennett, 1956; Bennett & Hays, 1960; Cover, 1967), there are at most  $\binom{d}{s}(mr)^{2s}$  effective (equivalence classes) proposal distributions  $\mathcal{R}(\cdot)$ . Taking a union bound over all such proposal distributions we prove our claim.  $\square$
